# Supplementary material for: Investigating the efficacy of Curcuma longa against Desulfovibrio desulfuricans influenced corrosion in low-carbon steel
Source: publisher site journal article supplement (doi:10.1515/corrrev-2021-0019), 2021-12-25
Supplement: Supplementary file 1 [file j_corrrev-2021-0019_suppl_001.docx]

**Figure S1** Dissolved sulfide concentration at different durations for the Baar's medium containing *Desulfovibrio desulfuricans*.

**Figure S2** X-ray diffraction pattern for the low-carbon steel in A) BUI B) BI broth at four immersion periods. Numbers on the spectra represent respective immersion weeks.

**Figure S3** Bode impedance moduli *vs.* frequency plots for uninhibited biotic coupon (BUI-A) and inhibited biotic coupon (BI-A). Bode phase angle plots for uninhibited biotic (BUI-B) and inhibited biotic (BI-B) coupons. The experimental data is represented by dots and the solid lines represent KKT fit.
